# Supplementary material for: Gastric bypass alters diurnal feeding behavior and reprograms the hepatic clock to regulate endogenous glucose flux
Source: JCI journal article supplement (doi:10.1172/jci.insight.166618), 2023-02-14
Supplement: sd1 [file 1]

## **Gastric bypass alters diurnal feeding behavior and reprograms hepatic clock to regulate endogenous glucose flux**

Yuanchao Ye<sup>1</sup>, Marwa Abu El-Haija<sup>2,3</sup>, Reine Obeid<sup>4</sup>, Hussein Herz<sup>1</sup>, Liping Tian<sup>5</sup>, Benjamin Linden<sup>1</sup>, Yi Chu<sup>1</sup>, Deng Fu Guo<sup>6,10</sup>, Daniel C. Levine<sup>7§</sup>, Jonathan Cedernaes<sup>7</sup>, Kamal Rahmouni<sup>1,6,8,9,10</sup>, Joseph Bass<sup>7</sup>, Mohamad Mokadem<sup>1,6,8,9,10\*</sup>

### **Affiliations:**

<sup>1</sup>Department of Internal Medicine, University of Iowa Carver College of Medicine, Iowa City, IA, 52242, USA

<sup>2</sup>Stead Family Department of Pediatrics, University of Iowa Carver College of Medicine, Iowa City, IA, 52242, USA

<sup>3</sup>Department of Pediatrics, Division of Gastroenterology, Hepatology, and Nutrition, Stanford University School of Medicine, Palo Alto, CA, 94304, USA

<sup>4</sup>Department of Biology, American University of Beirut, Beirut, 10150, Lebanon

<sup>5</sup>Department of Clinical Pharmacy, School of Basic Medicine and Clinical Pharmacy, China Pharmaceutical University, Nanjing, Jiangsu, PR China, 211198

<sup>6</sup>Department of Neuroscience and Pharmacology, University of Iowa Carver College of Medicine, Iowa City, IA, 52242, USA

<sup>7</sup>Department of Medicine, Feinberg School of Medicine, Northwestern University, Chicago, IL 60611, USA

<sup>8</sup>Fraternal Order of Eagles Diabetes Research Center, University of Iowa, Iowa City, IA, 52242, USA.

<sup>9</sup>Obesity Research & Education Initiative, University of Iowa, Iowa City, IA, 52242, USA.

<sup>10</sup>Veterans Affairs Health Care System, Iowa City, IA, 52242, USA.

<sup>§</sup> Current Affiliation: Department of Neurology, University of California San Francisco, San Francisco, CA, 94143, USA

### **\*Address correspondence to:**

Mohamad Mokadem, MD

University of Iowa

200 Hawkins Drive, 4570 JCP

Iowa City, IA, 52242

Phone: 319-384-6178; Fax: 319-354-7981

E-mail : [mohamad-mokadem@uiowa.edu](mailto:mohamad-mokadem@uiowa.edu)

## Supplemental Methods

### Real-Time Quantitative PCR

To measure circadian-related gene expression, total RNA was isolated from liver and SCN using Direct-zol™ RNA MiniPrep kit (Zymo Research, Irvine, CA). Total RNA (1 µg) was reverse transcribed to cDNA using cDNA High-Capacity Reverse Transcription Kit (Applied Biosystems, ThermoFisher). Real-time quantitative PCR (10 ng cDNA, 0.5 µM primers) was performed in duplicates using iQ™ SYBR® Green (Bio-Rad, Hercules, CA) per manufacturer's instructions.

The following primers were used:

|               |                            |
|---------------|----------------------------|
| Clock Forward | AGA CAT CGC TGG CTG TGT TA |
| Clock Reverse | TCA GAC CCT TCCTCC ACA CC  |
| Bmal Forward  | ATC GCA AGA GGA AAG GCA G  |
| Bmal Reverse  | GTG GGC CTC CCT TGC ATT    |
| Per1 Forward  | GCC TCC TTG CTA CAG GTA CA |
| Per1 Reverse  | GCT GTC CAG GCA GTT GATC   |
| Per2 Forward  | AGC TTC ATC AAC CCG TGG AG |
| Per2 Reverse  | GGG ACA GGC TGC ATC AGT AG |
| Cry1 Forward  | CAC TGG TTC CGA AAG GGA C  |
| Cry1 Reverse  | AGC AAA AAT CGC CAC CTG TT |
| Cry2 Forward  | CGG GGA CTC TGT CTA TTG GC |
| Cry2 Reverse  | GCA TCT CCG TCA CTC TAG CC |
| rps18 Forward | CTG CCA TTA AGG GCG TGG    |
| rps18 reverse | TGA TCA CTC GCT CCA CCT CA |

Ye et al.

Ribosomal related protein s18 (*Rps18*) mRNA expression was used as an internal control to normalize mRNA expression of these genes.

Supplemental Figures

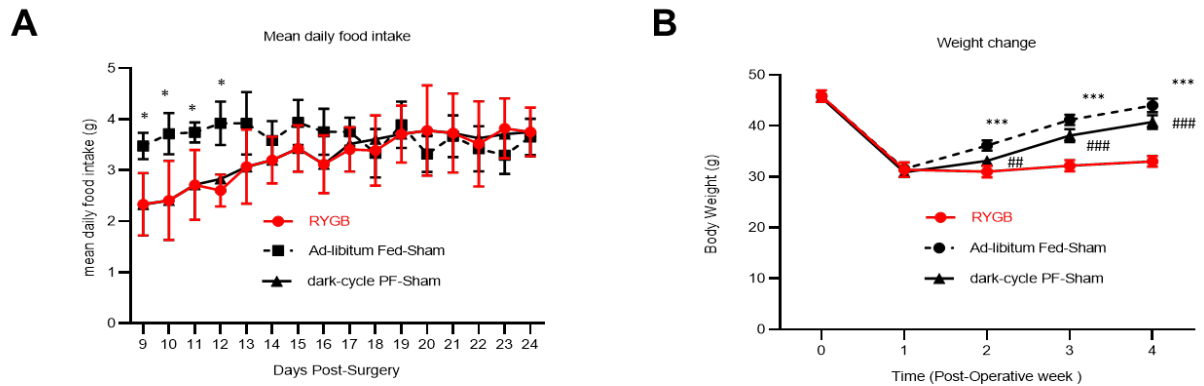

**Supplemental Figure 1.** (A) Mean daily food intake of HFD in (g) for RYGB, Ad-libitum Fed-Sham and dark-cycle pair fed (PF)-Sham over days post-surgery. (B) Weight change in (g) of RYGB, Ad-libitum Fed-Sham and dark-cycle pair fed (PF)-Sham over time in weeks. Average food intake (at each post-operative day) and body weights at each post-operative week were compared using Student's t-test.  $p < 0.001$ ,  $p < 0.05$  for Ad-libitum Fed-Sham vs RYGB,  $p < 0.001$ ,  $p < 0.01$  for dark-cycle PF-Sham vs RYGB. N, RYGB, n = 7, Ad-libitum Fed-Sham, n = 8, dark-cycle PF-Sham, n = 7.

**A**

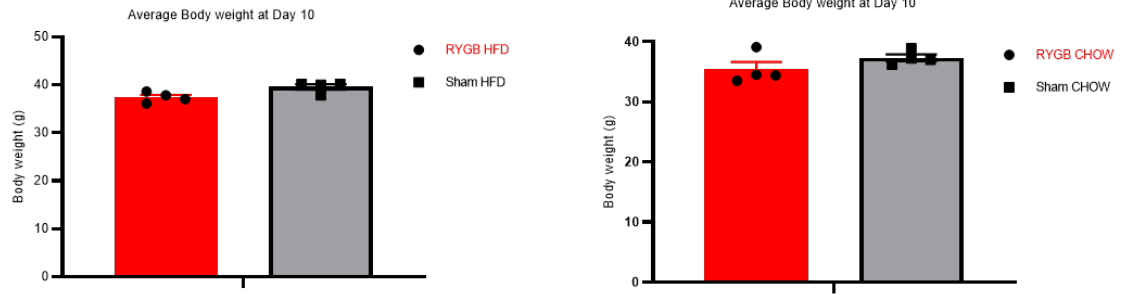

**B**

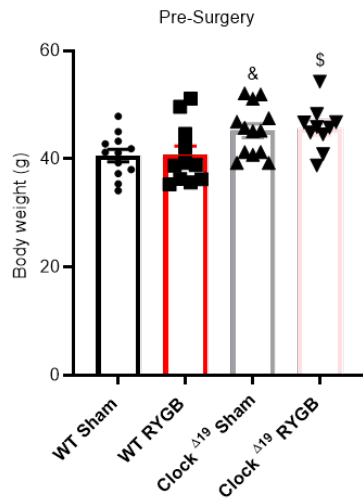

**Supplemental Figure 2.** (A) Average body weight in (g) post- RYGB in *mPer2<sup>Luc</sup>* knock in mice at day 10 post-RYGB while on HFD and CHOW diet compared to their Sham counterparts. Student t-test. N, RYGB=4, Sham=4.  $p > 0.05$ . (B) Average weekly body weight in (g) of pre-operative weight of RYGB-operated DIO *Clock*<sup>Δ19/Δ19</sup> mice and wild-type (WT) littermates maintained on a 60% HFD diet and under normal light-dark conditions, compared with their sham counterparts. Mean± SEM. WT Sham n=11, WT RYGB n=10, *Clock*<sup>Δ19/Δ19</sup> Sham n=11, *Clock*<sup>Δ19/Δ19</sup> RYGB n=10. One-Way ANOVA followed by Brown-Forsythe test. &, \$  $p < 0.05$ . & WT sham vs *Clock*<sup>Δ19/Δ19</sup> Sham, \$ WT RYGB vs *Clock*<sup>Δ19/Δ19</sup> RYGB.

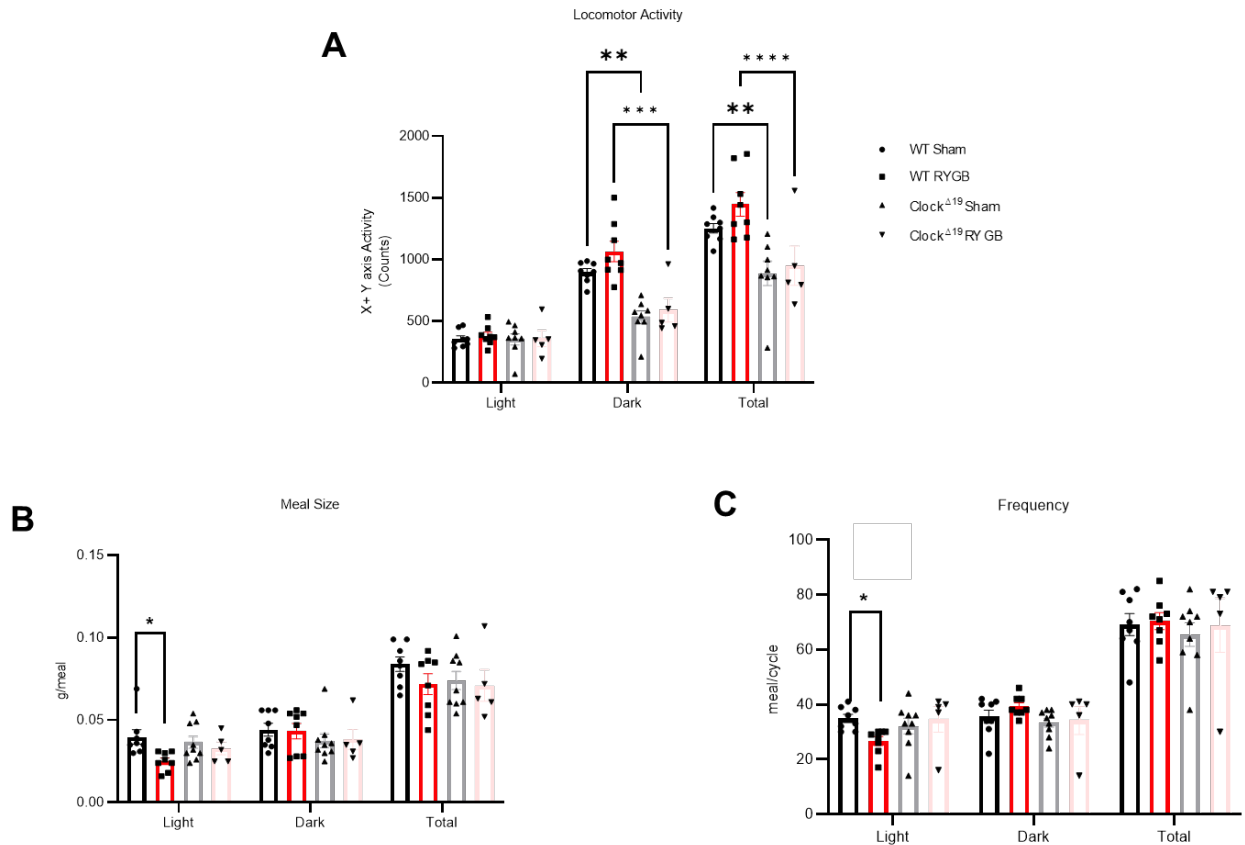

**Supplemental Figure 3.** (A) Average locomotor activity in (counts or beam breakage), (B) Average meal size in (g/meal), (C) average meal frequency in (meal/cycle) in RYGB-operated DIO *Clock* <sup>$\Delta 19/\Delta 19$</sup>  mice and wild-type (WT) littermates maintained on a 60% HFD diet and under normal light-dark conditions, compared with their sham counterparts. All data were obtained from measurements taken during the CLAMS system in free moving animals during post-operative week 3. Mean $\pm$  SEM. WT Sham n=8-11, WT RYGB n=7-10, *Clock* <sup>$\Delta 19/\Delta 19$</sup>  Sham n=11, *Clock* <sup>$\Delta 19/\Delta 19$</sup>  RYGB n=7-10 (clams data n=4). One-Way ANOVA followed by Tukey's test. \*,  $p < 0.05$ , \*\*\*\*,  $p < 0.0001$ . \*WT sham vs WT RYGB.

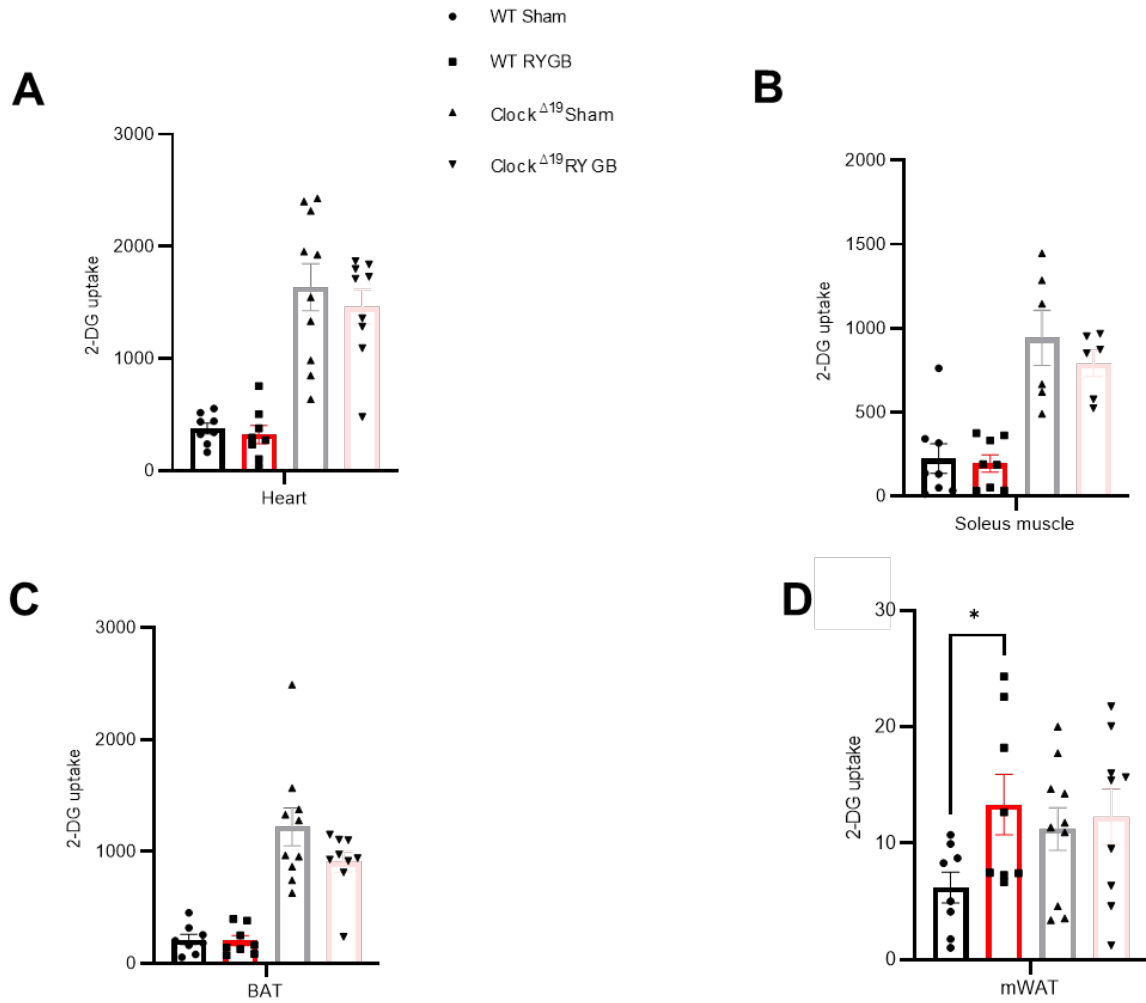

**Supplemental Figure 4.** Average 2-Deoxyglucose (2-DG) uptake within the (A) Heart, (B) Soleus muscle, (C) Brown adipose Tissue (BAT), and (D) mesenteric white adipose tissue (mWAT) in RYGB-operated DIO *Clock*<sup>Δ19/Δ19</sup> mice and wild-type (WT) littermates maintained on a 60% HFD diet and under normal light-dark conditions, compared with their sham counterparts. All data were obtained from measurements taken during the hyperinsulinemic hyperglycemic clamp six weeks after surgery. Mean ± SEM. WT Sham n=11, WT RYGB n=10, *Clock*<sup>Δ19/Δ19</sup> Sham n=11, *Clock*<sup>Δ19/Δ19</sup> RYGB n=10. One-Way ANOVA followed by Tukey's test. \*, *p* < 0.05. WT sham vs WT RYGB.
